# Supplementary material
Source: Springer Nature journal article supplement (https://www.springermedizin.de/resource/supplementary/40345_2013_21_MOESM5_ESM.pdf/25658314)
Supplement: MOESM5 [file 25658314]

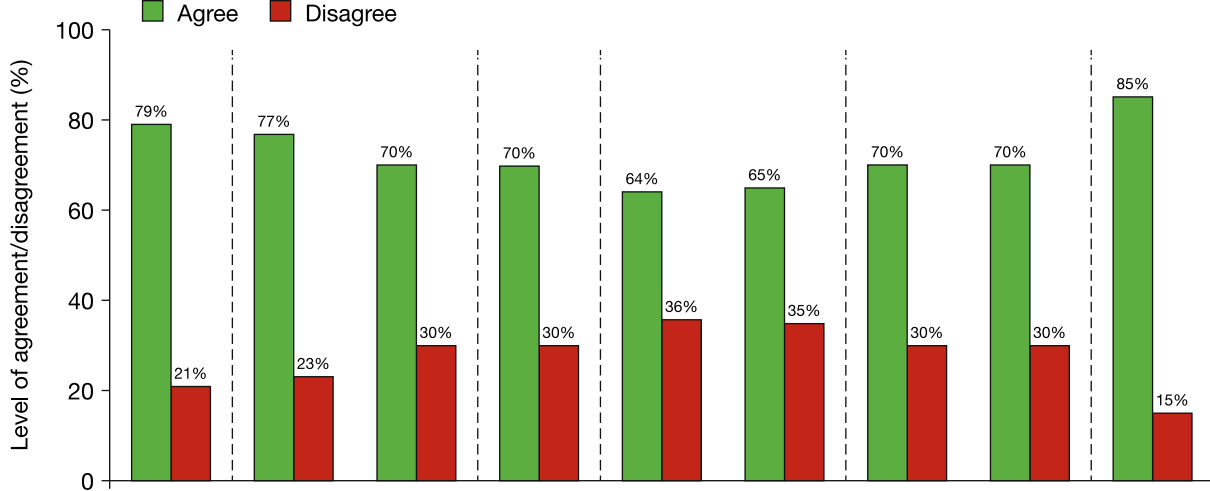

|                 |                                                  |                                         |                                                       |                                                   |                             |                               |                                    |                                                                 |                                                       |                                         |
|-----------------|--------------------------------------------------|-----------------------------------------|-------------------------------------------------------|---------------------------------------------------|-----------------------------|-------------------------------|------------------------------------|-----------------------------------------------------------------|-------------------------------------------------------|-----------------------------------------|
| <b>DSM-5</b>    | Q1: Prominent dysphoria or depressed mood        |                                         | Q2: Diminished interest or pleasure in activities     |                                                   | Q3: Psychomotor retardation | Q4: Fatigue or loss of energy |                                    | Q5a: Feelings of worthlessness or excessive/inappropriate guilt |                                                       | Q6: Recurrent thoughts of death/suicide |
| <b>M.I.N.I.</b> | Q1: felt sad, empty, tearful, down, or depressed | Q2a: Less interested in most activities | Q2b: Had less pleasure doing activities used to enjoy | Q3: Slowed down in speech, thoughts, or movements | Q4a: Had fatigue            | Q4b: Felt without energy      | Q5a: Had feelings of worthlessness | Q5b: Felt excessively guilty                                    | Q6: Wished you were dead/made plans to commit suicide |                                         |
